# Supplementary material for: Two highly crystalline coordination polymers with two-dimensional PbS networks for photocatalytic synthesis of imines
Source: Royal Society of Chemistry journal article supplement (doi:10.1039/d2cy00797e), 2022-01-01
Supplement: d2cy00797e1.pdf [file d2cy00797e1.pdf]

## Supporting Information

### Two highly crystalline coordination polymers with two-dimensional PbS networks for photocatalytic synthesis of imines

Yang Li,<sup>a,c</sup> Xiuyan Cheng,<sup>b,c</sup> Ze Li,<sup>a,c</sup> Yigang Jin,<sup>a,c</sup> Yimeng Sun,<sup>a</sup> Ye Zou,<sup>a</sup> Liyao Liu,<sup>a</sup> Ran Duan,<sup>d</sup> Jianling Zhang,<sup>\*b,c</sup> Wei Xu<sup>\*a,c</sup>

<sup>a</sup>Beijing National Laboratory for Molecular Sciences, CAS Key Laboratory of Organic Solids, Institute of Chemistry, Chinese Academy of Sciences, Beijing 100190, China.

<sup>b</sup>Beijing National Laboratory for Molecular Sciences, CAS Key Laboratory of Colloid, Interface and Chemical Thermodynamics, Institute of Chemistry, Chinese Academy of Sciences, Beijing 100190, China.

<sup>c</sup>University of Chinese Academy of Sciences, Beijing 100049, China.

<sup>d</sup>Beijing National Laboratory for Molecular Sciences, CAS Key Laboratory of Photochemistry, Institute of Chemistry, Chinese Academy of Sciences, Beijing 100190, China.

\*Corresponding author e-mail: zhangjl@iccas.ac.cn; wxu@iccas.ac.cn

## Table of contents

|                                                                                                                                                                                            |    |
|--------------------------------------------------------------------------------------------------------------------------------------------------------------------------------------------|----|
| General Information.....                                                                                                                                                                   | 4  |
| Synthesis of Pb-HBT.....                                                                                                                                                                   | 4  |
| Synthesis of Pb-BDT.....                                                                                                                                                                   | 4  |
| Photocatalytic oxidation of benzylamine.....                                                                                                                                               | 4  |
| Photoelectrochemical test.....                                                                                                                                                             | 4  |
| Quenching experiment.....                                                                                                                                                                  | 4  |
| Electron spin resonance (ESR) experiment.....                                                                                                                                              | 4  |
| Structure solving and refinement method.....                                                                                                                                               | 5  |
| Characterizations.....                                                                                                                                                                     | 5  |
| Fig. S1 Amplified image of PXRD pattern of Pb-HBT in the $2\theta$ range of $10^\circ$ to $80^\circ$ .....                                                                                 | 7  |
| Fig. S2 Amplified image of PXRD pattern of Pb-BDT in the $2\theta$ range of $15^\circ$ to $80^\circ$ .....                                                                                 | 8  |
| Fig. S3 Crystal structure of Pb-BDT: (a) Coordination environments of Pb. (b, c) Pb-S 2D networks. (d) Extended structure of Pb-BDT.....                                                   | 9  |
| Fig. S4 SEM-EDS images of Pb-HBT.....                                                                                                                                                      | 9  |
| Fig. S5 SEM-EDS images of Pb-BDT.....                                                                                                                                                      | 10 |
| Fig. S6 EPMA data of Pb-HBT.....                                                                                                                                                           | 10 |
| Fig. S7 EPMA data of Pb-BDT.....                                                                                                                                                           | 10 |
| Fig. S8 Raman spectrum of Pb-HBT.....                                                                                                                                                      | 11 |
| Fig. S9 FT-IR spectrum of Pb-HBT.....                                                                                                                                                      | 11 |
| Fig. S10 Raman spectra of BDT and Pb-BDT.....                                                                                                                                              | 12 |
| Fig. S11 FT-IR spectrum of Pb-BDT.....                                                                                                                                                     | 12 |
| Fig. S12 (a) The full XPS spectrum, (b) S 2p XPS spectrum and (c) Pb 4f XPS spectrum of Pb-HBT. (d) The full XPS spectrum, (e) S 2p XPS spectrum and (f) Pb 4f XPS spectrum of Pb-BDT..... | 13 |
| Fig. S13 TGA curves of Pb-HBT and Pb-BDT.....                                                                                                                                              | 14 |
| Fig. S14 Calculated band structure of Pb-HBT.....                                                                                                                                          | 14 |
| Fig. S15 Calculated band structure of Pb-BDT.....                                                                                                                                          | 15 |
| Scheme S1 Proposed reaction mechanism for the photocatalytic oxidation of benzylamine over the Pb-HBT.....                                                                                 | 15 |
| Table S1 Crystallographic data of Pb-HBT and Pb-BDT.....                                                                                                                                   | 16 |
| Table S2 Element analysis data of Pb-HBT and Pb-BDT.....                                                                                                                                   | 17 |

|                                                                                  |    |
|----------------------------------------------------------------------------------|----|
| Table S3 Catalytic performances of various photocatalysts.....                   | 18 |
| Table S4 Effect of scavengers on benzylamine oxidation catalyzed by Pb-HBT. .... | 19 |
| References.....                                                                  | 20 |

### **General Information.**

4-Hydroxybenzenethiol and *p*-benzoquinone (BQ) were purchased from J&K Scientific Ltd. 1,4-Benzenedithiol, benzylamine, 4-methylbenzylamine, 4-methoxybenzylamine, 4-tert-butylbenzylamine, 4-bromobenzylamine, 4-fluorobenzylamine, 4-trifluoromethylbenzylamine, 5,5-dimethyl-1-pyrroline *N*-oxide (DMPO), 2,2,6,6-tetramethylpiperidine (TEMP) and beta-carotene were purchased from Innochem Science & Technology Co., Ltd.  $\text{Pb}(\text{CH}_3\text{COO})_2 \cdot 3\text{H}_2\text{O}$  was purchased from Acros Organic of Thermo Fisher Scientific Co., Ltd.

### **Synthesis of Pb-HBT.**

4-Hydroxybenzenethiol (0.2524 g, 2 mmol) was dissolved in 40 mL degassed  $\text{H}_2\text{O}$  under argon atmosphere. Then,  $\text{Pb}(\text{CH}_3\text{COO})_2 \cdot 3\text{H}_2\text{O}$  (0.3793 g, 1 mmol) was added. The mixture was heated at 120 °C for 24 h. The solid was collected by filtration and washed with  $\text{H}_2\text{O}$ , methanol, diethyl ether. After drying under vacuum at 60 °C for 12 h, the product was obtained as black brown solid (> 90% yield).

### **Synthesis of Pb-BDT.**

1,4-Benzenedithiol (0.142 g, 1 mmol) was suspended in 40 mL degassed  $\text{H}_2\text{O}$  under argon atmosphere. Then,  $\text{Pb}(\text{CH}_3\text{COO})_2 \cdot 3\text{H}_2\text{O}$  (0.19 g, 0.5 mmol) was added. The mixture was heated at 85 °C for 24 h. The solid was collected by filtration and washed with  $\text{H}_2\text{O}$ , methanol, diethyl ether. After drying under vacuum at 60 °C for 12 h, the product was obtained as brown solid (40-50% yield).

### **Photocatalytic oxidation of benzylamine.**

5 mg photocatalyst was added to a 50 mL round-bottom flask, then 5 mL acetonitrile and 0.5 mmol substrate were added in sequence. The mixture was stirred in air for 30 min. After sealed by a rubber stopper, the reaction system was irradiated by a 300 W Xe lamp ( $350 < \lambda < 780$  nm, Aulight CEL-HX, Beijing) for desired time while cooling with circulating water device. The mixed product was analyzed by  $^1\text{H}$  nuclear magnetic resonance ( $^1\text{H}$  NMR). The conversion (conv.), selectivity (select.) and production rate were calculated from the integration of  $^1\text{H}$ -NMR peaks using 1,3,5-trioxane as an internal standard.

### **Photoelectrochemical test.**

3 mg of the photocatalyst was suspended in a mixture of 140  $\mu\text{L}$  ethanol and 10  $\mu\text{L}$  5 % Nafion solution. The mixture system was sonicated for 30 min and transferred to a piece of 1  $\text{cm}^2$  indium-tin oxide (ITO) in batches to prepare working electrodes. The photoelectrochemical measurement was carried out at electrochemical workstation (CHI660E, Chenhua Instrument, Shanghai, China). A three-electrode system with the photocatalyst-coated ITO as the working electrode, 1  $\text{cm}^2$  Pt net as the counter electrode and saturated Ag/AgCl as a reference electrode was used. 0.5 M  $\text{Na}_2\text{SO}_4$  solution was used as electrolyte to conduct the photoelectrochemical test.

### **Quenching experiment.**

The quenching experiment was the same as photocatalytic oxidation of benzylamine experiment in addition to 2 equivalents of scavengers (beta-carotene and *p*-benzoquinone) were added.

### **Electron spin resonance (ESR) experiment.**

2 mg of catalyst was added to 2 mL acetonitrile in a 50 mL round-bottom flask under dark condition. After stirring in air for 30 min, the mixture was mixed with 10  $\mu$ L trapping agent of TEMP or DMPO. Then the mixture was light-illuminated at room temperature and analyzed by Bruker ELEXSYS II E500.

#### **Structure solving and refinement method.**

The Pb-HBT (HBT = 4-hydroxybenzenethiol) structure was solved from powder XRD pattern of the as prepared sample, recorded on a high-resolution X-ray powder diffractometer (Rigaku SmartLab 9KW,  $\lambda$  (Cu K $\alpha$ 1) = 1.540593 Å) with Debye-Scherrer transmission geometry in  $2\theta$  ranging from 4° to 120°. The indexing process was performed by EXPO2014<sup>1</sup> using the program N-TREOR09.<sup>2</sup> A monoclinic unit cell with  $a = 15.12$  Å,  $b = 5.20$  Å,  $c = 7.63$  Å,  $\beta = 95.54^\circ$ ,  $V = 597.37$  Å<sup>3</sup> was obtained with figure of merit  $M_{20} = 76.0$  from the first 23 XRD peaks in the  $2\theta$  range of 3° to 40°. The initial lattice parameters were refined by le Bail algorithm using Jana2006.<sup>3</sup> Background, zero-point, profile shape and asymmetry parameters were refined together to get the profile fitting converged with GOF = 0.76, Rp = 4.99, Rwp = 6.78. The space group was determined as P2<sub>1</sub>/c based on symmetric extinction calculation. The structure was solved with direct method using Super flip program.<sup>4</sup> The final Rietveld refinement with involving the coordination parameters and thermal factors of Pb, S, O and C atoms was performed with Jana2006<sup>3</sup> and converged with GOF = 1.00, Rp = 6.85%, Rwp = 9.52%.

The Pb-BDT (BDT = benzene-1,4-dithiol) structure was solved from powder XRD pattern of the as prepared sample, recorded on a Debye-Scherrer transmission geometry by high resolution X-ray powder diffractometer (Rigaku SmartLab 9KW,  $\lambda$  (Cu K $\alpha$ 1) = 1.540593 Å) with  $2\theta$  ranging from 5° to 120°. The indexing process was performed by EXPO2014<sup>1</sup> using the program N-TREOR09.<sup>2</sup> A monoclinic unit cell with  $a = 7.48$  Å,  $b = 5.21$  Å,  $c = 17.46$  Å,  $\beta = 93.38^\circ$ ,  $V = 678.83$  Å<sup>3</sup> was obtained with figure of merit  $M_{20} = 49.0$  from the first 23 XRD peaks in the  $2\theta$  range of 5° to 40°. The initial lattice parameters were refined by le Bail algorithm using Jana2006.<sup>3</sup> Background, zero-point, profile shape and asymmetry parameters were refined together to get the profile fitting converged with GOF = 0.73, Rp = 2.23, Rwp = 2.98. The space group was determined as P2<sub>1</sub>/c based on symmetric extinction calculation. The structure was solved with direct method using Super flip program.<sup>4</sup> The final Rietveld refinement with involving the coordination parameters and thermal factors of Pb, S, and C atoms was performed with Jana2006<sup>3</sup> and converged with GOF = 0.88, Rp = 2.69%, Rwp = 3.58%.

#### **Characterizations.**

The scanning electron microscopy (SEM) and SEM-Energy-dispersive X-ray spectroscopy (SEM-EDS) images were obtained by Toshiba SU8020 SEM. High-resolution transmission electron microscopy (HRTEM) images were obtained by Themis 300. TEM-EDS images were obtained by JEM 2100F (JEOL) TEM with an accelerated voltage of 200 kV. The contents of C, H and S were analyzed by Flash EA 1112 (Thermo Fisher Scientific). The S/Pb ratio was confirmed by EPMA (JEOL, JXA-8,100). Fourier transform infrared spectroscopy (FT-IR) was obtained at a TENSOR-27 spectrometer (Bruker). Raman spectra were recorded using a LabRAM HR Evolution

(HORIBA) Raman spectrometer with the excitation wavelength of 532 nm at room temperature. X-ray photoelectron spectroscopy (XPS) was performed by AXIS Ultra-DLD ultrahigh vacuum photoemission spectroscopy system (Kratos Co.). Thermogravimetric analysis (TGA) was carried out by a TGA Q500 instrument with a heating rate of 10 °C·min<sup>-1</sup> under a nitrogen flow. Ultraviolet-visible diffused reflectance spectra (UV-Vis DRS) were collected with an UV-2000 (SHIMADZU) spectrophotometer at room temperature. Photoluminescence (PL) spectra were recorded at room temperature with a Hitachi F-4600 fluorescence spectrophotometer with the excitation wavelength of 390 nm. ESR spectra were collected on a Bruker ELEXSYS II E500 spectrometer.

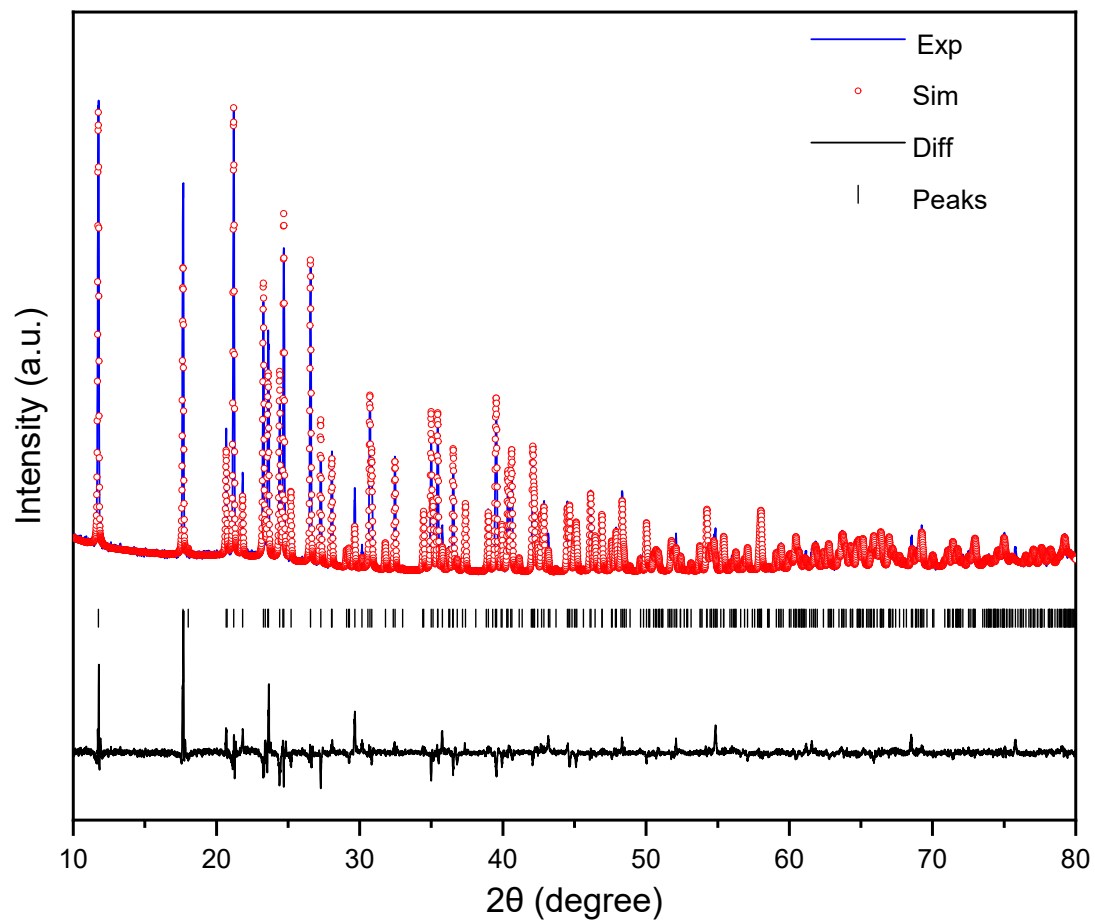

**Fig. S1** Amplified image of PXRD pattern of Pb-HBT in the  $2\theta$  range of  $10^\circ$  to  $80^\circ$ .

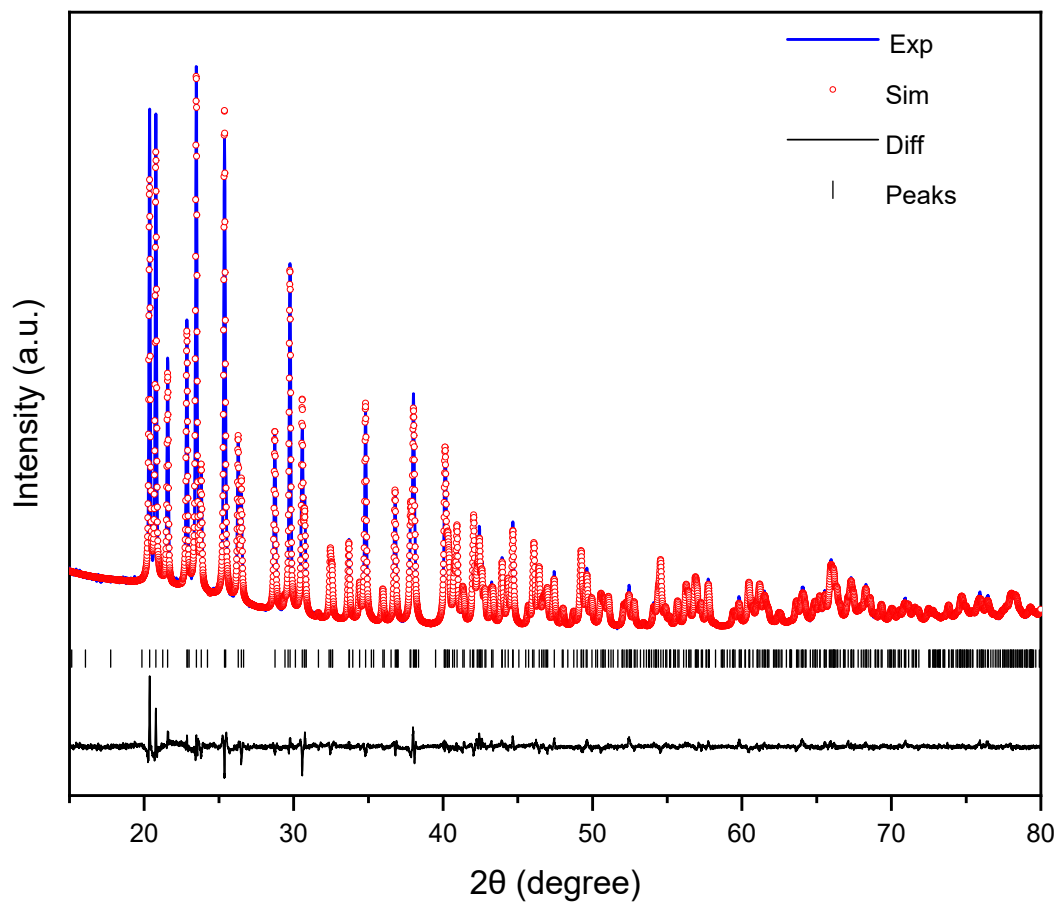

**Fig. S2** Amplified image of PXRD pattern of Pb-BDT in the  $2\theta$  range of  $15^\circ$  to  $80^\circ$ .



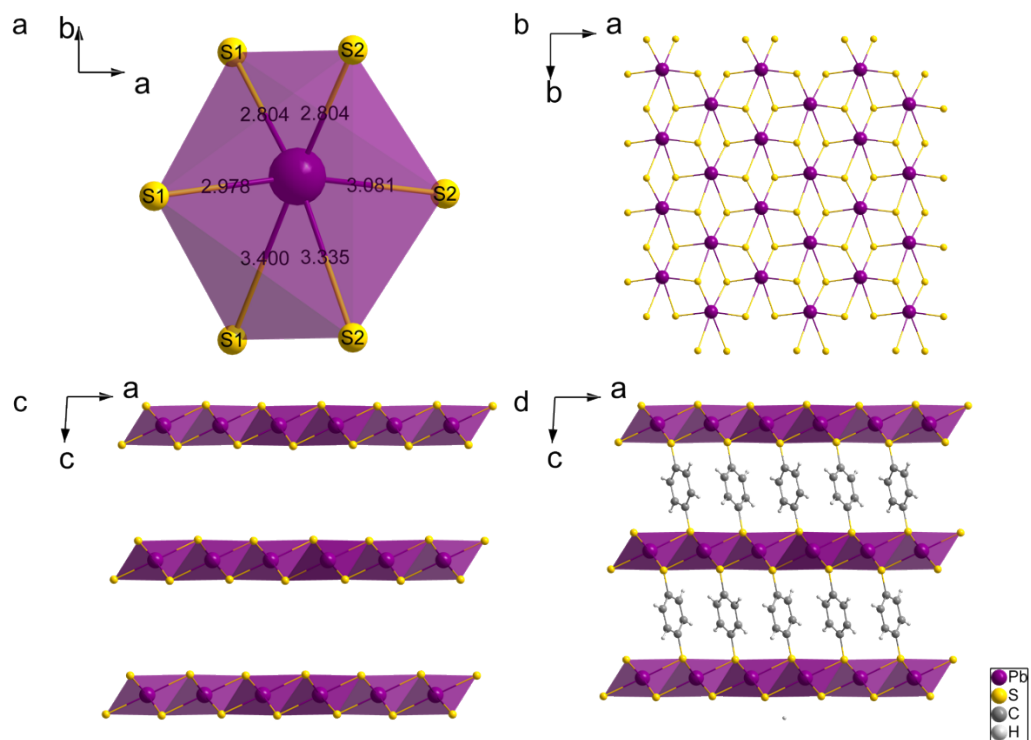

**Fig. S3** Crystal structure of Pb-BDT: (a) Coordination environments of Pb. (b, c) Pb-S 2D networks. (d) Extended structure of Pb-BDT.

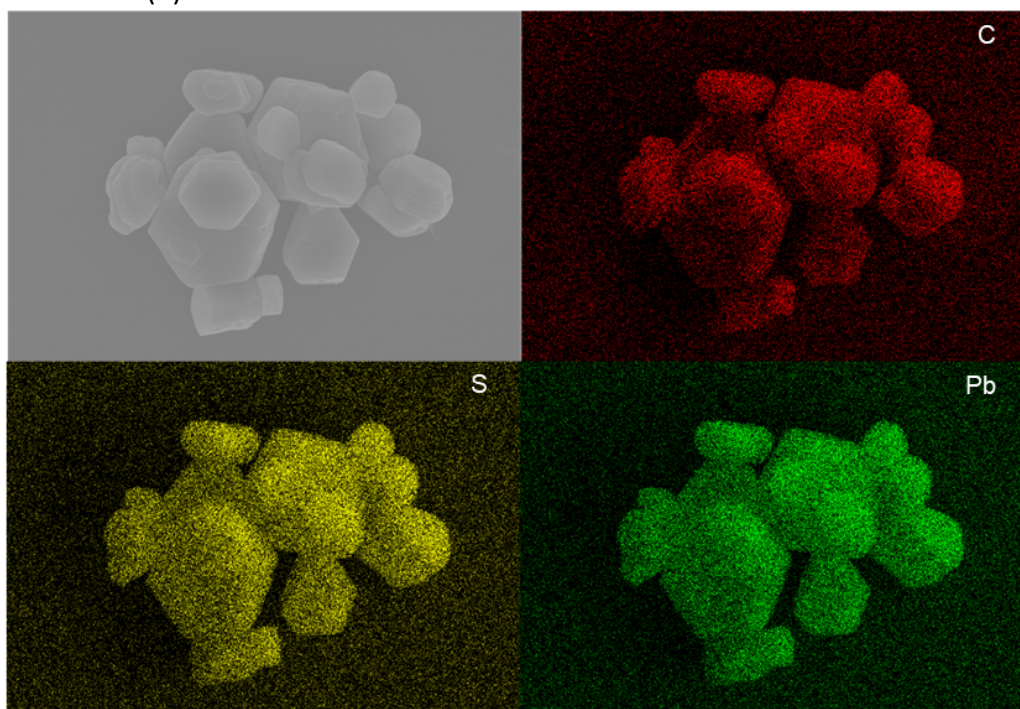

**Fig. S4** SEM-EDS images of Pb-HBT.

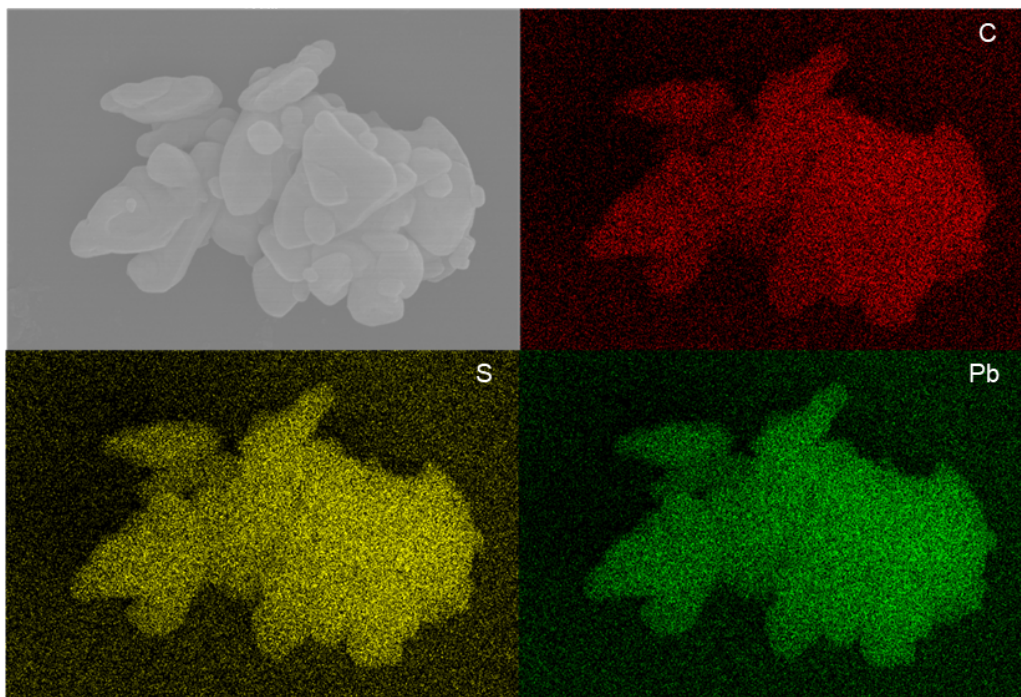

**Fig. S5** SEM-EDS images of Pb-BDT.

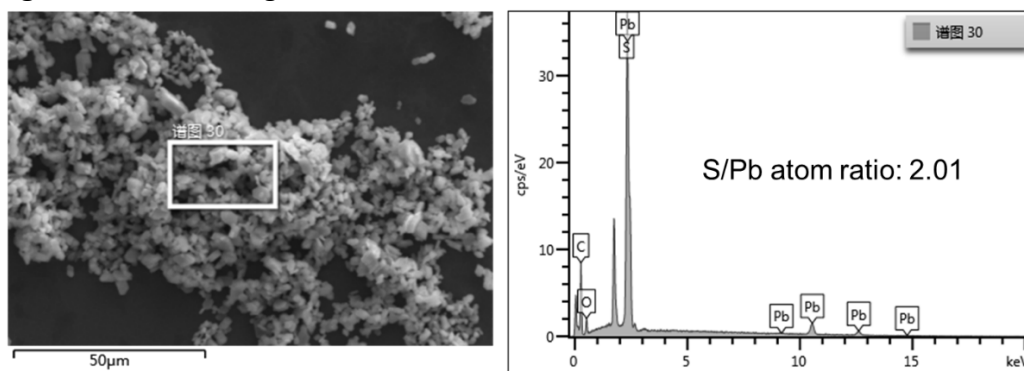

**Fig. S6** EPMA data of Pb-HBT.

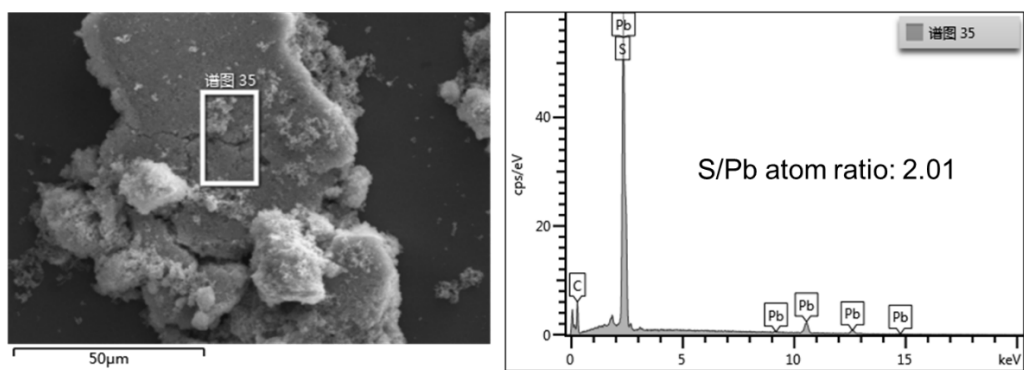

**Fig. S7** EPMA data of Pb-BDT.

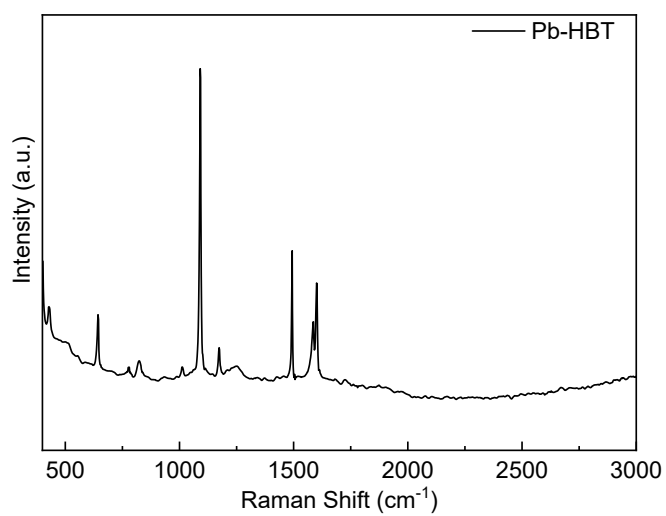

**Fig. S8** Raman spectrum of Pb-HBT.

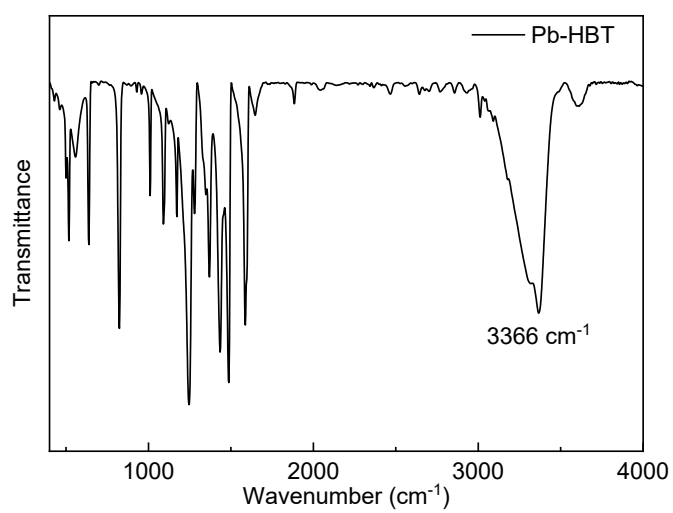

**Fig. S9** FT-IR spectrum of Pb-HBT.

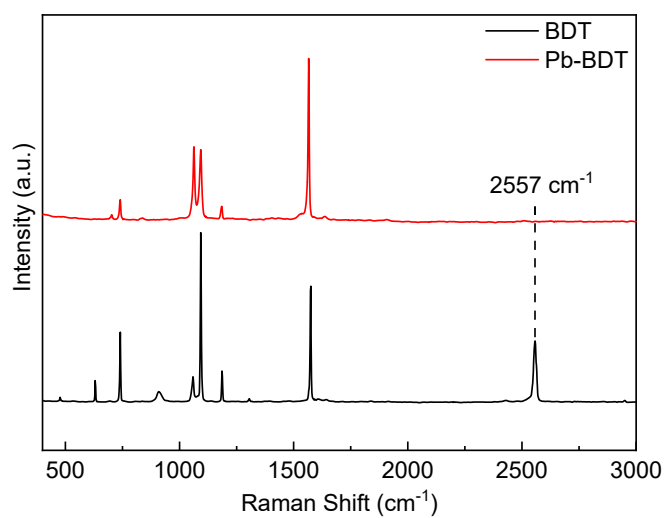

**Fig. S10** Raman spectra of BDT and Pb-BDT.

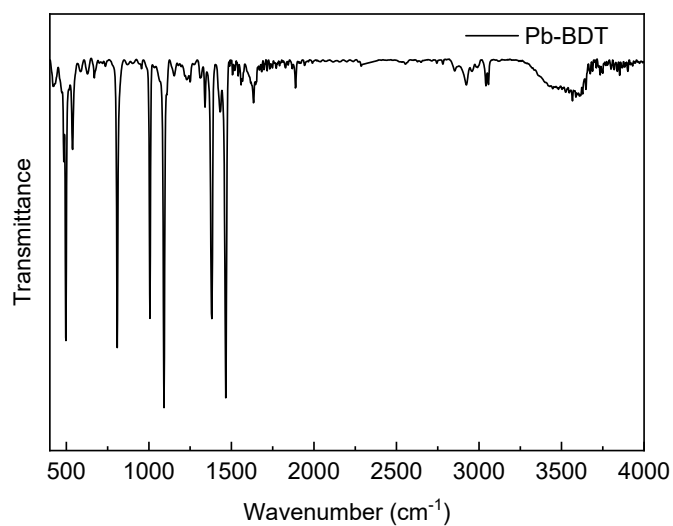

**Fig. S11** FT-IR spectrum of Pb-BDT.

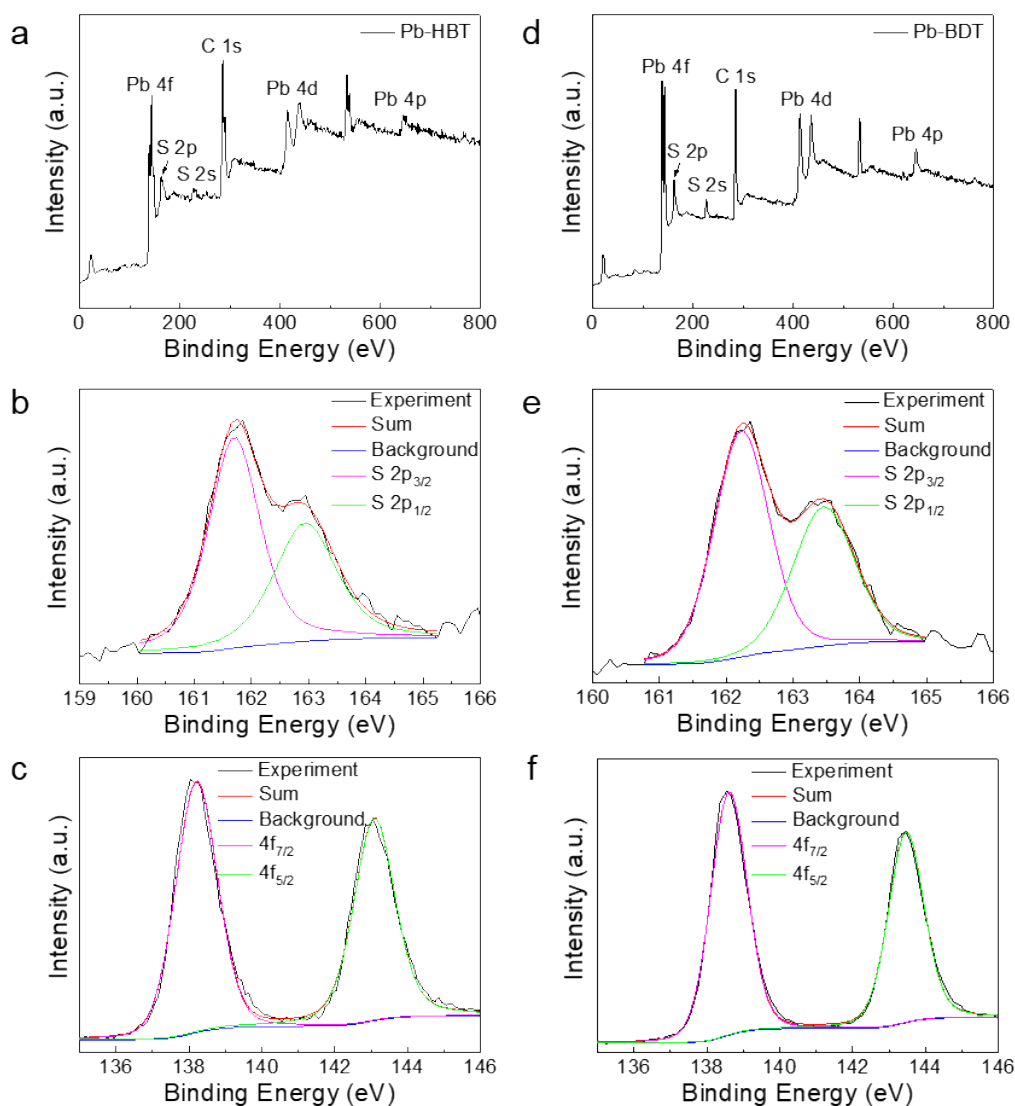

**Fig. S12** (a) The full XPS spectrum, (b) S 2p XPS spectrum and (c) Pb 4f XPS spectrum of Pb-HBT. (d) The full XPS spectrum, (e) S 2p XPS spectrum and (f) Pb 4f XPS spectrum of Pb-BDT.

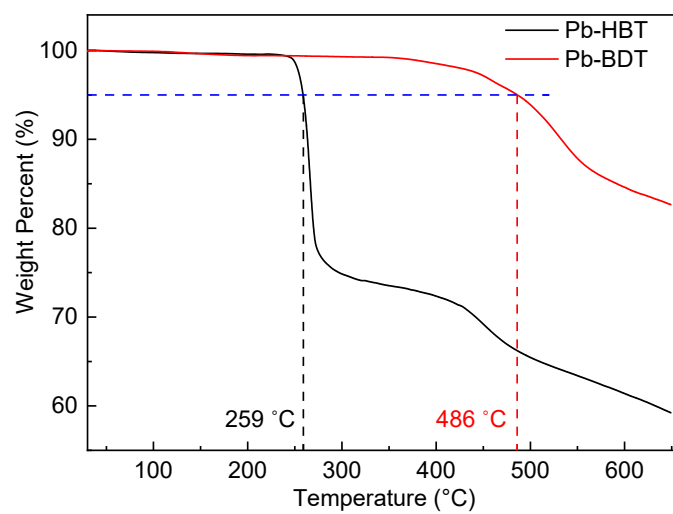

**Fig. S13** TGA curves of Pb-HBT and Pb-BDT.

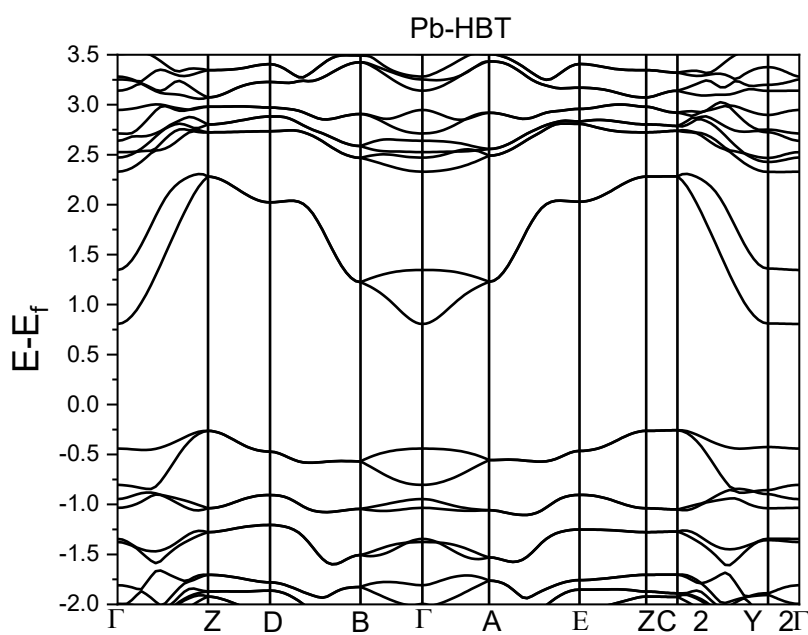

**Fig. S14** Calculated band structure of Pb-HBT.

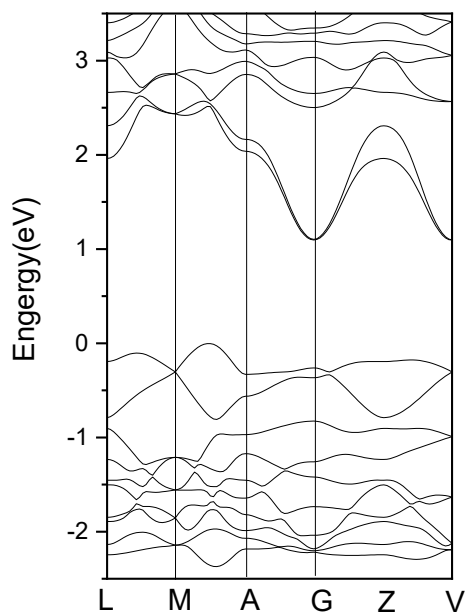

**Fig. S15** Calculated band structure of Pb-BDT.

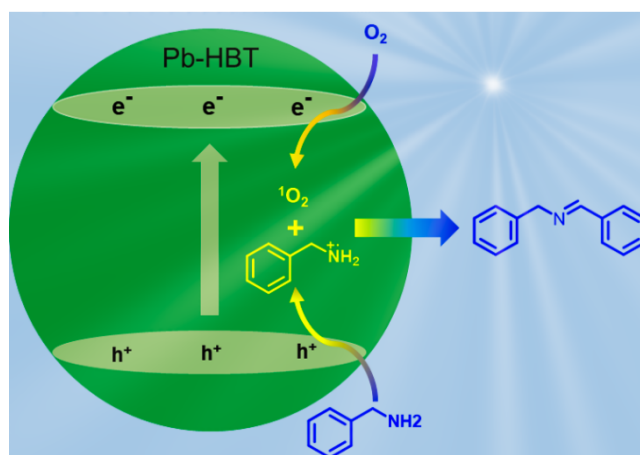

**Scheme S1** Proposed reaction mechanism for the photocatalytic oxidation of benzylamine over the Pb-HBT.

**Table S1** Crystallographic data of Pb-HBT and Pb-BDT.

|                                       |                                                                 |                                                |
|---------------------------------------|-----------------------------------------------------------------|------------------------------------------------|
| Empirical formula                     | PbC <sub>12</sub> S <sub>2</sub> O <sub>2</sub> H <sub>10</sub> | PbC <sub>6</sub> S <sub>2</sub> H <sub>4</sub> |
| Formula weight                        | 457.52                                                          | 347.41                                         |
| Temperature, K                        | 293                                                             | 293                                            |
| Wavelength, Å                         | 1.540593                                                        | 1.540593                                       |
| Crystal system                        | Monoclinic                                                      | Monoclinic                                     |
| space group                           | P2 <sub>1</sub> /c                                              | P2 <sub>1</sub> /c                             |
| <i>a</i> , Å                          | 15.1207                                                         | 7.4789(7)                                      |
| <i>b</i> , Å                          | 5.2004                                                          | 5.2068(5)                                      |
| <i>c</i> , Å                          | 7.6325                                                          | 17.4623(16)                                    |
| $\beta$ , °                           | 95.5358                                                         | 93.3828(19)                                    |
| Volume, Å <sup>3</sup>                | 597.367                                                         | 678.83(11)                                     |
| Z                                     | 2                                                               | 4                                              |
| Calculated density, Mg/m <sup>3</sup> | 2.544                                                           | 3.399                                          |
| $\theta$ range for data collection, ° | 4 to 120                                                        | 5 to 120                                       |
| Refinement method                     | Rietveld                                                        | Rietveld                                       |
| GOF                                   | 1.00                                                            | 0.88                                           |
| R <sub>p</sub> , %                    | 6.85                                                            | 2.69                                           |
| R <sub>w</sub> p, %                   | 9.52                                                            | 3.58                                           |



**Table S2** Element analysis data of Pb-HBT and Pb-BDT.

|        | Elements   | C (wt%) | H (wt%) | S (wt%) |
|--------|------------|---------|---------|---------|
| Pb-HBT | Found      | 31.44   | 2.23    | 14.13   |
|        | Calculated | 31.50   | 2.20    | 14.01   |
| Pb-BDT | Found      | 21.00   | 1.26    | 18.98   |
|        | Calculated | 20.74   | 1.16    | 18.46   |

**Table S3** Catalytic performances of various photocatalysts.

| Catalysts                                  | Conditions                                                                                                                | Time (h) | Conv. (%) | Select. (%) | Production rate of <i>N</i> -benzylbenzaldimine ( $\mu\text{mol}\cdot\text{g}^{-1}\cdot\text{h}^{-1}$ ) | Ref.      |
|--------------------------------------------|---------------------------------------------------------------------------------------------------------------------------|----------|-----------|-------------|---------------------------------------------------------------------------------------------------------|-----------|
| TiO <sub>2</sub> (Degussa P25) (10 mg)     | benzylamine (0.1 mmol), CH <sub>3</sub> CN (5 mL), air (1 atm).<br>100 W Hg lamp ( $\lambda \geq 300$ nm)                 | 9        | 99        | 85          | 467.5                                                                                                   | 5         |
| HNb <sub>3</sub> O <sub>8</sub> NS (20 mg) | benzylamine (0.25 mmol), CH <sub>3</sub> CN (10 mL), air, 300 W Xe lamp ( $\lambda > 420$ nm)                             | 6        | 95.0      | 98.9        | 978.7                                                                                                   | 6         |
| NH <sub>2</sub> -MIL-125(Ti) (5 mg)        | benzylamine (0.1 mmol), CH <sub>3</sub> CN (2.0 mL), saturated O <sub>2</sub> , 300 W Xe lamp ( $420 < \lambda < 800$ nm) | 12       | 73.0      | 86.0        | 523.2                                                                                                   | 7         |
| n-NH <sub>2</sub> -MIL-125 (10 mg)         | benzylamine (0.2 mmol), MeCN (4 mL), air, 25 °C, 300 W Xe lamp ( $350 < \lambda < 780$ nm).                               | 9        | 98.5      | 99          | 1083.5                                                                                                  | 8         |
| Cd(dcbpy) (10 mg)                          | benzylamine (0.48 mmol), DMF (5 ml), air, 300 W Xe lamp ( $350 < \lambda < 780$ nm)                                       | 7        | 99.1      | >99         | 3397.7                                                                                                  | 9         |
| PCN-222 (Zr-MOF) (5 mg)                    | benzylamine (0.1 mmol), CH <sub>3</sub> CN (3 mL), air, 100 mW cm <sup>-2</sup> Xe lamp ( $\lambda \geq 420$ nm).         | 1        | 100       | 100         | 10000.0                                                                                                 | 10        |
| Pb-BDT (5 mg)                              | benzylamine (0.5 mmol), CH <sub>3</sub> CN (10 mL), air, 300 W Xe lamp ( $350 < \lambda < 780$ nm)                        | 10       | 100       | 96.8        | 4838.0                                                                                                  | This work |
| Pb-HBT (5 mg)                              | benzylamine (0.5 mmol), CH <sub>3</sub> CN (10 mL), air, 300 W Xe lamp ( $350 < \lambda < 780$ nm)                        | 9        | 100       | 90.2        | 5010.6                                                                                                  | This work |

**Table S4** Effect of scavengers on benzylamine oxidation catalyzed by Pb-HBT.<sup>[a]</sup>

| Scavengers    | Quenching group         | Conv. (%) <sup>[b]</sup> | Select. (%) <sup>[b]</sup> |
|---------------|-------------------------|--------------------------|----------------------------|
| beta-carotene | $^1\text{O}_2$          | 67.5                     | 100.0                      |
| BQ            | $\text{O}_2^{\bullet-}$ | 94.6                     | 98.5                       |

<sup>[a]</sup>Reaction conditions: 5 mg catalyst, 5 mL acetonitrile, 0.5 mmol benzylamine, 2 equivalents of scavenger, 9 h, 300 W Xe lamp ( $350 < \lambda < 780$  nm). <sup>[b]</sup> Conv. and Select. were determined by  $^1\text{H}$  NMR.

The conversion of benzylamine at 9 h decreases from 100% to 67.5% with beta-carotene as a scavenger to capture  $^1\text{O}_2$ , revealing that  $^1\text{O}_2$  is a reactive oxygen species (ROS) for the photocatalytic oxidation of benzylamine. In contrast, the conversion of benzylamine at 9 h only decreases to 94.6% when BQ as a scavenger to capture  $\text{O}_2^{\bullet-}$ . These results suggest that the main ROS in the photocatalytic reactions is  $^1\text{O}_2$ .

## References

- 1 A. Altomare, C. Cuocci, C. Giacomazzo, A. Moliterni, R. Rizzi, N. Corriero and A. Falcicchio, *J. Appl. Crystallogr.*, 2013, **46**, 1231–1235.
- 2 A. Altomare, G. Campi, C. Cuocci, L. Eriksson, C. Giacomazzo, A. Moliterni, R. Rizzi and P.-E. Werner, *J. Appl. Crystallogr.*, 2009, **42**, 768–775.
- 3 V. Petříček, M. Dušek and L. Palatinus, *Z. Krist.-Cryst. Mater.*, 2014, **229**, 345–352.
- 4 L. Palatinus and G. Chapuis, *J. Appl. Crystallogr.*, 2007, **40**, 786–790.
- 5 X. Lang, H. Ji, C. Chen, W. Ma and J. Zhao, *Angew. Chem., Int. Ed.*, 2011, **50**, 3934–3937.
- 6 J. Chen, H. Wang, Z. Zhang, L. Han, Y. Zhang, F. Gong, K. Xie, L. Xu, W. Song and S. Wu, *J. Mater. Chem. A*, 2019, **7**, 5493–5503.
- 7 D. Sun, L. Ye and Z. Li, *Appl. Catal., B*, 2015, **164**, 428–432.
- 8 X. Tan, J. Zhang, J. Shi, X. Cheng, D. Tan, B. Zhang, L. Liu, F. Zhang, B. Han and L. Zheng, *Sustain. Energy. Fuels*, 2020, **4**, 2823–2830.
- 9 J. Shi, J. Zhang, T. Liang, D. Tan, X. Tan, Q. Wan, X. Cheng, B. Zhang, B. Han, L. Liu, F. Zhang and G. Chen, *ACS Appl. Mater. Inter.*, 2019, **11**, 30953–30958.
- 10 C. Xu, H. Liu, D. Li, J. H. Su and H. L. Jiang, *Chem. Sci.*, 2018, **9**, 3152–3158.
